# Perceived Discrimination and Self-Rated Health in South Korea: A Nationally Representative Survey

Seung-Sup Kim<sup>1\*</sup>, David R. Williams<sup>2</sup>

**1** Department of Environmental and Occupational Health, The George Washington University School of Public Health and Health Services, Washington, D.C., United States of America, **2** Department of Society, Human Development, and Health, Harvard School of Public Health, Boston, Massachusetts, United States of America

## Abstract

**Background:** There is mounting evidence that discriminatory experiences can harm health. However, previous research has mainly focused on the health effects of racial discrimination in U.S. or European countries although there is pervasive discrimination by gender, age, education and other factors in Asian countries.

**Methods:** We analyzed the data from the 7th wave of Korean Labor and Income Panel Study to investigate the association between perceived discriminatory experience and poor self-rated health in South Korea. Perceived discriminatory experiences were measured in eight situations through a modified Experience of Discrimination questionnaire. In each of eight situations, the lifetime prevalence of perceived discriminatory experience was compared between men and women and the main causes of those experiences were identified separately by gender. After adjusting for potential confounders, we examined the association between perceived discriminatory experience and poor self-rated health in each of eight social situations and also checked the association using the number of situations of perceived discriminatory experiences.

**Results:** For both men and women, education level and age were the main sources of work-related perceived discriminatory experiences. Gender was one of the main causes among women across eight situations and more than 90% of women reported their gender as a main cause of discriminatory experience in getting higher education and at home. Discriminatory experiences in four situations were positively associated with poor self-rated health. The odds ratio for poor self-rated health for those exposed to one, two, three or four or more social situations of perceived discrimination were respectively 1.06 (95% CI : 0.87–1.29), 1.15 (95% CI : 0.96–1.55), 1.59 (95% CI : 1.19–2.14), and 1.78 (95% CI :1.26–2.51).

**Conclusion:** There is consistent association between perceived discriminatory experience and poor self-rated health across eight social situations in South Korea.

**Citation:** Kim S-S, Williams DR (2012) Perceived Discrimination and Self-Rated Health in South Korea: A Nationally Representative Survey. PLoS ONE 7(1): e30501. doi:10.1371/journal.pone.0030501

**Editor:** Monica Uddin, Wayne State University, United States of America

**Received:** February 22, 2011; **Accepted:** December 16, 2011; **Published:** January 17, 2012

**Copyright:** © 2012 Kim, Williams. This is an open-access article distributed under the terms of the Creative Commons Attribution License, which permits unrestricted use, distribution, and reproduction in any medium, provided the original author and source are credited.

**Funding:** These authors have no support or funding to report.

**Competing Interests:** The authors have declared that no competing interests exist.

\* E-mail: sskim@gwu.edu

## Introduction

There is growing scientific interest in the multiple ways in which discrimination can harm health. Studies in several national and cultural contexts have shown that there is a strong and consistent pattern in which self-reports of discrimination are positively associated with indicators of poor physical and mental health such as hypertension, heart disease and depression as well as indicators of high-risk health behaviors [1–3]. The previous literature has emphasized the health effects of discrimination based on race or ethnicity [4–11].

However, a growing body of evidence suggests that other types of self-reported discrimination, based on other factors, such as an individual's gender, weight, sexual orientation or age, can also be predictive of poor health status. This is evident in U.S. data and also in studies from other countries [1]. For example, analyses from the Whitehall Study in the UK have found that non-racial discrimination was an independent risk factor for poor health outcomes. Ferrie and the colleagues found that unfair treatment by

supervisors was associated with incident psychiatric disorders [12]. Similarly, prospective analyses from Whitehall found that self-reported unfairness was related to both incident coronary events and metabolic syndrome among white-collar British civil servants [13,14]. Studies in South Africa, have also found that non-racial as well as racial discrimination was associated with increased risks of mental health problems, even after adjustment for socio-demographic factors and other stressors [15,16].

However, there have been few empirical studies of the prevalence of perceived discrimination and its potential effects on health in Asian countries, even though these countries have pervasive discrimination based on gender, age, education level, birth region, sexual orientation and race or ethnicity [17–20]. Prior studies in Asian countries have focused on the health effects of discriminatory experiences of specific stigmatized groups such as rural to urban migrants in China [21], Japanese Brazilians in Japan [19], and young Mainland Chinese immigrants in Hong Kong [20]. However, we are unaware of any research on the health effects of perceived discrimination in a general population of an Asian country.

South Korea's history of strong patriarchal social traditions [22] and the Confucian ideology of male superiority [23] is believed to contribute to systemic patterns of discrimination that women encounter in multiple settings. At home, they are required to carry out most domestic responsibilities and face a high level of sex-selective abortion [23–25]. At work, female workers are more likely than their male peers (63.5% versus 39.7% in 2010) to work in non-permanent jobs which are low paid and unstable [22,26]. Compared with men, women in South Korea also have lower socioeconomic status and a higher prevalence of depression and chronic diseases [27]. However, to date, no research in South Korea has examined how discriminatory experience is associated with health outcome in women, and how this association differs from that in men.

This paper explored the association between perceived discriminatory experiences and poor self-rated health and whether this association is modified by gender using a nationally representative survey from South Korea. Specifically, our research sought answer to the following questions:

1. What is the prevalence of lifetime discriminatory experiences in South Korea? Does it differ by gender?
2. What are the main sources of attribution for perceived discrimination in South Korea? Do these differ by gender?
3. How are experiences of discrimination related to self-rated health? Does this association vary by the social context in which the experience occurs? Does the association reflect a dose-response pattern?

## Methods

### Data

The Korean Labor and Income Panel Study (hereafter KLIPS) is a nationally representative panel survey of the urban population in South Korea. The first survey was launched in 1998, and data have been collected yearly since then. The data were collected through in-person interviews by trained personnel. The KLIPS recruited 5000 households in urban areas, using two stage stratified cluster sampling at the baseline. To date, data from the first to 11<sup>th</sup> waves (1998–2008) have been publicly released [<http://www.kli.re.kr/>]. The 7<sup>th</sup> wave (2004) of the survey included questions on experiences of discrimination, and data from this wave were used for this cross-sectional analysis.

### Measures

Perceived discrimination was measured using a modified version of the Experience of Discrimination (EOD) questionnaire [28], which asked participants whether they had “ever experienced discrimination” in eight specific situations: in getting hired, income, training, promotion, fired, getting higher education, at home, and in general social activities. For each question, participants answered “Yes”, “No”, or “Not Applicable”. Those responding “Yes”, were asked to report the main reason why they thought they had been discriminated against. These included “gender”, “age”, “education level”, “disability”, “birth region”, and “other”. Certain birth regions in South Korea, such as Cholla province including Chollanam-do, Chollabuk-do and Gwangju have historically been politically and economically isolated and stigmatized [29,30]. Participants were allowed to report multiple causes of perceived discriminatory experiences.

The health outcome, self-rated health, was measured with the question “How would you rate your overall health?” Responses ranging from ‘excellent’ (1) to ‘very poor’ (5) were dichotomized

into good health (0, for responses 1–3) and poor health (1, for responses 4–5). Self-rated health has been shown to be predictive of objective health outcomes [31,32]. For example, a review of 27 empirical studies found self-rated health to be an independent predictor of mortality even after adjusting for potential confounders, including numerous specific health-status indicators [33].

Several potential confounders were included in the study. Age was included as a continuous variable. Marital status was categorized into never, currently, and previously married, with the currently married as the reference group. Education was coded into four categories: junior high or less (reference group), high school graduate, college graduate, and university graduate or more. We adjusted for income and employment status because they are known correlates of experiences of discrimination and of health outcomes. An equivalized monthly household income was calculated by summing all sources of income including earnings, interest, rents and dividends and dividing it by the square root of the number of household members. The resulting income measure was categorized into four quartiles using the lowest quartile as a reference group. Occupation was categorized into five mutually exclusive categories: “precarious worker”, “non-precarious worker”, “employer”, “full-time student” and “unemployed” (included full-time housewives). Each occupational category was coded as a dummy variable (= 1) with “unemployed” used as the reference group (= 0). Precarious workers were defined as wage workers employed temporarily, daily, or part-time, while all other wage workers were defined as non-precarious. Previous studies show that precarious workers are disadvantaged compared to non-precarious workers in terms of wages, social benefits, labor union membership, and health status in South Korea [34,35].

### Data Analyses

We first estimated the gender-specific prevalence of each of the eight specific perceived discriminatory experiences, after excluding the respondents who answered ‘Not applicable’. We also examined by gender the proportion of participants reporting the six most common sources of perceived discrimination (i.e., gender, age, education level, disability, birth region, and other). Participants were allowed to report multiple causes of their perceived discriminatory experiences.

All analyses were performed using STATA/SE version 11.0 (StataCorp, College Station, TX). Multivariate logistic regression was used to examine associations between self-reported lifetime experiences of discrimination and poor self-rated health controlling for multiple covariates in each of eight situations after excluding the participants answering “Not Applicable” in each situation. In the fully adjusted model, we tested whether the health effect of perceived discriminatory experiences was modified by gender in each of the eight situations. Furthermore, in order to check for a dose-response relationship between perceived discriminatory experiences and self-rated health, the discrimination score was coded 0 through 4, corresponding to whether the participants had experienced discrimination in 0, 1, 2, 3, or 4 or more situations. There were respondents ( $n = 4,249$ ) who answered “Yes” or “No” for at least one situation and “Not Applicable” for other situations, they are included in calculating the discrimination score, assuming that had not experienced discrimination in the situations that they answered “Not Applicable”. However, a dummy variable was created that contrasted respondents, who answered “Not Applicable” for all eight situations ( $n = 584$ ) to those who did not. This variable was included in the model. Because participants belonging to the same family are likely to have similar exposures and outcomes (4746 participants had family members in the sample), the Huber-White

sandwich estimator were used to calculate odds ratio confidence intervals robust to within-family clustering [36,37].

## Ethics

The KLIPS is the publicly released dataset which can be downloaded from the website of Korea Labor Institute (<http://www.kli.re.kr/>). So we do not need an informed consent to use this dataset. This research received IRB exemption from Office of Human Research Administration at the Harvard School of Public Health.

## Results

Table 1 presents the estimated prevalence of the lifetime prevalence of discrimination by sociodemographic characteristics. Women (vs. men), those with lower education (vs. higher education), non-precarious workers (vs. precarious workers and employers), the previously married (vs. those never married, the currently married) are significantly more likely to have experienced discrimination.

The distribution of various types of discrimination and the reported reasons for discrimination, for both men and women, are reported in Table 2. Men report higher prevalence of discriminatory experiences in getting promoted than women but women report higher prevalence of discrimination in education and at home than men. There was no gender difference in perceived discrimination in other work-related situations and in general social activities. Gender, education level and age were the most frequently reported reasons for discriminatory experiences across the eight situations. The most common reason reported by men was education level, followed by age. Attribution to other reasons was high for some specific types of discrimination. Among men, disability was the most common reason for perceived discrimination in getting higher education, while birth region was the most frequently mentioned in getting promoted. For both men and women, age was the most common reason reported for discrimination in getting fired. Among women, gender was the most common reason for perceived discrimination with more than 35% of women reporting gender as a cause of their experience across all the types of discrimination. Regarding discriminatory

**Table 1.** Distribution of Study Population and Prevalence of Lifetime Perceived Discrimination, South Korea, 2004 (n = 11,544).

|                           | Distribution (%) | Lifetime prevalence of any reported discrimination (%) | P-value <sup>a</sup> |
|---------------------------|------------------|--------------------------------------------------------|----------------------|
| Sex                       |                  |                                                        |                      |
| Male                      | 48.2             | 20.0                                                   | 0.004                |
| Female                    | 51.8             | 22.1                                                   |                      |
| Age (years old)           |                  |                                                        |                      |
| 16–25                     | 15.8             | 11.1                                                   | 0.001                |
| 25–34                     | 21.7             | 22.4                                                   |                      |
| 35–44                     | 20.6             | 23.0                                                   |                      |
| 45–54                     | 17.3             | 23.4                                                   |                      |
| 55–64                     | 11.9             | 24.8                                                   |                      |
| 65–                       | 12.7             | 21.8                                                   |                      |
| Education                 |                  |                                                        |                      |
| Junior high or less       | 30.5             | 26.3                                                   | <0.001               |
| High school graduate      | 36.6             | 20.9                                                   |                      |
| College graduate          | 11.2             | 21.7                                                   |                      |
| University and more       | 21.7             | 13.7                                                   |                      |
| Household income          |                  |                                                        |                      |
| 1Q-                       | 24.2             | 26.4                                                   | <0.001               |
| 2Q–3Q                     | 25.4             | 23.2                                                   |                      |
| 3Q–4Q                     | 25.3             | 20.6                                                   |                      |
| 4Q-                       | 25.1             | 14.4                                                   |                      |
| Marriage                  |                  |                                                        |                      |
| Never married             | 27.0             | 10.6                                                   | <0.001               |
| Previously married        | 21.6             | 62.7                                                   |                      |
| Current married           | 17.6             | 26.6                                                   |                      |
| Occupation                |                  |                                                        |                      |
| Unemployed                | 39.0             | 22.6                                                   | <0.001               |
| Full time student         | 11.1             | 4.05                                                   |                      |
| Precarious employment     | 8.6              | 38.4                                                   |                      |
| Non-precarious employment | 27.9             | 23.4                                                   |                      |
| Employer                  | 13.4             | 14.9                                                   |                      |

<sup>a</sup>P-value : Chi-square test about the difference of lifetime prevalence of perceived discriminatory experience across different socio-demographic groups.

doi:10.1371/journal.pone.0030501.t001

**Table 2.** Prevalence of Main Reasons for Perceived Discriminatory Experience After Stratified by Gender, South Korea, 2004.

| Men (n = 5,561)     | Prevalence <sup>a</sup>         |                           | Distribution of main reasons for discriminatory experience <sup>b</sup> (%) |           |      |            |              |        |           |
|---------------------|---------------------------------|---------------------------|-----------------------------------------------------------------------------|-----------|------|------------|--------------|--------|-----------|
|                     | No. of respondents <sup>c</sup> | N (%)                     | sex                                                                         | education | age  | disability | birth region | others | not reply |
| Hired               | 4,393                           | 809 (18.4)                | 3.2                                                                         | 62.1      | 41.5 | 5.2        | 4.2          | 5.8    | 0         |
| Income              | 4,424                           | 563 (12.7)                | 5.2                                                                         | 75.0      | 32.6 | 3.7        | 1.9          | 0      | 4.8       |
| Training            | 4,115                           | 84 (2.0)                  | 5.0                                                                         | 62.5      | 20.0 | 18.8       | 5.0          | 0      | 4.8       |
| Promotion           | 4,024                           | 253 (6.3)** <sup>d</sup>  | 3.9                                                                         | 82.3      | 14.7 | 4.3        | 13.9         | 0      | 8.7       |
| Fired               | 4,103                           | 101 (2.5)                 | 1.1                                                                         | 35.2      | 58.0 | 12.5       | 6.8          | 0      | 12.9      |
| Education           | 5,091                           | 19 (0.4)*** <sup>d</sup>  | 11.1                                                                        | 16.7      | 16.7 | 55.6       | 0            | 0      | 5.3       |
| At home             | 5,229                           | 27 (0.5)*** <sup>d</sup>  | 37.5                                                                        | 25.0      | 8.3  | 29.2       | 0            | 0      | 11.1      |
| Societal activities | 5,287                           | 394 (7.5)                 | 9.5                                                                         | 73.3      | 27.5 | 11.6       | 5.6          | 0      | 4.1       |
| Women (n = 5,983)   | Prevalence <sup>a</sup>         |                           | Distribution of main reasons for discriminatory experience <sup>b</sup> (%) |           |      |            |              |        |           |
|                     | No. of respondents <sup>c</sup> | N (%)                     | sex                                                                         | education | age  | disability | birth region | others | not reply |
| Hired               | 4,062                           | 721 (17.7)                | 36.9                                                                        | 41.9      | 45.9 | 1.9        | 1.1          | 5.4    | 0         |
| Income              | 4,038                           | 554 (13.7)                | 58.2                                                                        | 42.8      | 25.0 | 1.3        | 0.8          | 0      | 6.0       |
| Training            | 3,574                           | 64 (1.8)                  | 49.1                                                                        | 43.6      | 23.6 | 3.6        | 0            | 0      | 14.1      |
| Promotion           | 3,446                           | 166 (4.8)** <sup>d</sup>  | 79.3                                                                        | 34.0      | 5.3  | 0.7        | 3.3          | 0      | 9.6       |
| Fired               | 3,730                           | 73 (2.0)                  | 43.3                                                                        | 17.9      | 44.8 | 4.5        | 1.5          | 0      | 8.2       |
| Education           | 5,086                           | 178 (3.5)*** <sup>d</sup> | 92.6                                                                        | 3.4       | 0.6  | 3.4        | 1.7          | 0      | 1.1       |
| At home             | 5,543                           | 344 (6.2)*** <sup>d</sup> | 95.9                                                                        | 1.8       | 2.3  | 1.2        | 0            | 0      | 0.6       |
| Societal activities | 5,521                           | 437 (7.9)                 | 57.7                                                                        | 47.0      | 27.7 | 4.7        | 3.0          | 0      | 1.6       |

<sup>a</sup>Prevalence of perceived discriminatory experience in each situation.

<sup>b</sup>Since respondents are allowed to answer multiple causes, the sum of proportion in each situation can be added up to over 100%.

<sup>c</sup>The number of respondents for each questions after excluding the respondents who answered "Not applicable".

<sup>d</sup>P-value: Chi-square test about the difference of prevalence of perceived discriminatory experience between men and women in each situation (Legend: \*  $p < .05$ ;

\*\*  $p < .01$ ;

\*\*\* $p < .001$ ).

doi:10.1371/journal.pone.0030501.t002

experiences outside of the workplace, more than 90% of women reported their gender as the source of discriminatory experiences in getting higher education and at home. Discriminatory experiences because of education level and age were frequently reported by women for work-related discriminatory experiences.

In initial analyses, we tested effect modification by gender in the association between perceived discriminatory experience and poor self-rated health in each of eight situations. The p-value for the gender interaction term was not statistically significant except for discrimination at home. Accordingly, results are presented for the entire sample. Table 3 shows that the odds of being in poor health among individuals who reported experiencing discrimination is consistently higher, in unadjusted models, than that of those who reported no discrimination, with the exception of discrimination in promotion. Each cell in the table reflects a separate analytic model. When adjusted for demographic factors (age, gender and marital status), the odds ratios for work-related discrimination tend to get larger, those for discrimination in education and at home are substantially reduced and the odds for discrimination in social activities are essentially unchanged. With further adjustment for socio-economic status, the association between all types of discrimination and poor self-rated health is reduced but remains significant for discrimination in hiring, income, being fired and in general social activities.

We also examined the extent to which there was a dose-response relationship between the number of situations of perceived discriminatory experiences and poor self-rated health

(Table 4). After adjusting for potential confounding, the odds ratios for poor self-rated health for those exposed to one, two, three or four or more situations of perceived discrimination in their lifetime were respectively 1.06 (95% CI : 0.87–1.29), 1.15 (95% CI : 0.96–1.55), 1.59 (95% CI : 1.19–2.14) and 1.78 (95% CI:1.26–2.51).

## Discussion

Although South Korea is widely viewed as a "one-ethnicity" country without racial discrimination, our findings suggest that multiple types of discrimination based on other social statuses occur in South Korea and that these self-reported experiences of discrimination were significantly associated with poor self-rated health. Perceived discriminatory experience in four of the eight situations was significantly related to poor self-rated health even after adjustment for demographic and socio-economic variables. And we also found a relationship between number of situations of perceived discriminatory experience and poor self-rated health, consistent with a dose-response relationship.

We did not find significant gender differences in the association between various types of perceived discrimination and poor self-rated health except for discrimination at home. This is different from a prior study of Asians in the U.S. found that women were more likely, compared to men, to have poor mental and physical health outcomes when they were exposed to a low level of discriminatory experience [38]. Future studies are needed to

**Table 3.** Association Between Perceived Discriminatory Experience and Poor Self-Rated Health in Eight Situations, South Korea, 2004 (n = 11,544).

| Situations        | N <sup>c</sup> | Unadjusted OR |              | Adjusted for socio-demographic variables <sup>a</sup> |              | Adjusted for socio-demographics and SES <sup>b</sup> |              |
|-------------------|----------------|---------------|--------------|-------------------------------------------------------|--------------|------------------------------------------------------|--------------|
|                   |                | OR            | 95% CI       | OR                                                    | 95% CI       | OR                                                   | 95% CI       |
| Hired             | 8,455          | 1.47          | (1.26, 1.72) | 1.69                                                  | (1.42, 2.01) | 1.34                                                 | (1.12, 1.61) |
| Income            | 8,462          | 1.38          | (1.16, 1.64) | 1.55                                                  | (1.28, 1.88) | 1.33                                                 | (1.09, 1.62) |
| Training          | 7,689          | 1.56          | (1.02, 2.37) | 1.91                                                  | (1.17, 3.13) | 1.61                                                 | (0.99, 2.62) |
| Promotion         | 7,470          | 0.89          | (0.65, 1.22) | 1.10                                                  | (0.78, 1.57) | 1.20                                                 | (0.83, 1.74) |
| Fired             | 7,833          | 2.25          | (1.59, 3.19) | 1.84                                                  | (1.23, 2.76) | 1.51                                                 | (1.01, 2.28) |
| Education         | 10,177         | 3.76          | (2.77, 5.09) | 1.61                                                  | (1.09, 2.38) | 1.37                                                 | (0.94, 1.99) |
| At home           | 10,842         | 2.96          | (2.38, 3.68) | 1.37                                                  | (1.04, 1.79) | 1.18                                                 | (0.90, 1.55) |
| Social activities | 10,808         | 1.95          | (1.64, 2.33) | 1.97                                                  | (1.61, 2.41) | 1.57                                                 | (1.28, 1.92) |

<sup>a</sup>Adjusted for age, sex, marital status.<sup>b</sup>Adjusted for age, sex, marital status, disability, income, education level, employment status including full-time student.<sup>c</sup>Number of participants who answered Yes or No, not 'Not Applicable' in each situation and who are analyzed in the multiple logistic regression.

doi:10.1371/journal.pone.0030501.t003

examine the extent to which gender may affect the association between discrimination and health outcomes in Korea, using more specific health outcome like schizophrenia or cardiovascular disease.

Regarding work-related discrimination such as discrimination in getting hired, there could be an issue about what constitute a discriminatory experience. It is possible that people report discriminatory experience when they did not get hired due to their educational level in a fair hiring process. But there are several reasons that our results may still be valid despite this possibility. First, it is well known that perceptions of discriminatory experience could play a role as a stressor and harm people's health regardless of the actual fairness of the hiring process [1]. Second, several studies have demonstrated the association between perceived discrimination and poor health outcome in prospective study designs after adjusting for potential psychological confounding factors [39–41]. Third, research reveals that respondents understand the concept of discrimination as intended by researchers and reports of personal experiences of discrimination are consistent with objective experiences [42,43].

### Discrimination in South Korea

Our analyses found that their education level was the main cause of work-related discriminatory experiences in both men and women. In South Korea, education level is regarded as a type of "caste" because people's educational opportunities differ by socio-economic status, education level is critical in shaping one's life opportunities [44,45], and education is an important contributor to wider inequalities in health [46,47]. Even among university graduates, there is discrimination based on the university from which people graduated. For example, across different government administrations in South Korea, more than 45% of political leaders (ministers and vice ministers) since 1953, were graduates from one specific university [45]. This strong patterning of social opportunity could reflect both differences across universities in educational quality as well as, systemic preferences for graduates from selected universities.

Democratization and the feminist movement have sought to weaken the long tradition of patriarchy and the influence of Confucianism [22,48] that has historically led to gender discrimination in South Korea. And in 1987, South Korea established the Equal Employment Act to prohibit gender

discrimination in employment. However, consistent with evidence of a continuing substantial preference for sons that is responsible for gender-selective abortions [24,25], the present study found that in 2004, South Korean women reported that they experienced various kinds of discrimination. A relatively high proportion of women indicated that they had been unfairly treated in getting hired and in receiving wages because of their gender, and compared to men, women reported a ten-fold higher prevalence of discrimination in getting higher education and at home. More than 90% of women reported their gender as the main reason for experiences of discrimination in the latter two situations.

Interestingly, South Korean men reported a higher prevalence of discrimination in promotion than women but this difference may be partially attributable to the reality of the long history of labor market discrimination that ensured that women had fewer opportunities to work outside the home compared to men [48,49]. In addition, it is also possible that there are gender differences in the reporting of work discrimination, with women being more likely to deny personal experiences of work discrimination than men [50].

More attention also needs to be paid to age as an important source of discrimination in getting fired, for both men and women. South Korea is one of the world's fastest ageing societies with the lowest birth rate among the Organization for Economic Co-operation and Development (OECD) countries [51]. In post-hoc analyses in the group who reported discrimination in getting fired, 88% of those over 64 years old attributed their experience of this discriminatory experience to their age. In contrast, only 36% of respondents in under 65 years old viewed age as the reason for being unfairly fired. The labor force participation rate of people over 64 in South Korea is more than twice that of other OECD countries [52]. A primary reason for this high participation rate is that many older persons confront considerable financial distress if they do not continue to work, even if they often have to work in precarious or low paying jobs [53]. Given this situation, the health effect of unfair dismissal for the elderly in South Korea can have a large negative impact on their economic well-being as well as their health. Thus, the recent enactment of the "Age Discrimination in Employment Act" in 2010 in South Korea has the potential to enhance the health of the elderly.

Consistent with the view that South Korea is an ethnically homogeneous nation, our analyses did not find substantial reports

**Table 4.** Association Between Perceived Discriminatory Experience and Poor Self-Rated Health, South Korea, 2004 (n = 11,544).

|                                                | Unadjusted |              | Adjusted for demographic variables |              | Adjusted for demographics and SES |              |
|------------------------------------------------|------------|--------------|------------------------------------|--------------|-----------------------------------|--------------|
|                                                | OR         | 95% CI       | OR                                 | 95% CI       | OR                                | 95% CI       |
| No. of situations of discriminatory experience |            |              |                                    |              |                                   |              |
| All NA                                         | 2.51       | (2.03, 3.10) | 1.88                               | (1.45, 2.43) | 1.53                              | (1.19, 1.98) |
| 0                                              | 1.00       | Referent     | 1.00                               | Referent     | 1.00                              | Referent     |
| 1                                              | 1.49       | (1.26, 1.76) | 1.19                               | (0.99, 1.44) | 1.06                              | (0.87, 1.29) |
| 2                                              | 1.38       | (1.13, 1.68) | 1.42                               | (1.13, 1.79) | 1.22                              | (0.96, 1.55) |
| 3                                              | 1.87       | (1.47, 2.37) | 1.87                               | (1.41, 2.47) | 1.59                              | (1.19, 2.14) |
| 4 or more                                      | 1.84       | (1.34, 2.52) | 2.21                               | (1.55, 3.16) | 1.78                              | (1.26, 2.51) |
| Age                                            |            |              |                                    |              |                                   |              |
| Continuous (years)                             |            |              | 1.08                               | (1.08, 1.09) | 1.04                              | (1.04, 1.05) |
| Gender                                         |            |              |                                    |              |                                   |              |
| Male                                           |            |              | 1.00                               | Referent     | 1.00                              | Referent     |
| Female                                         |            |              | 1.49                               | (1.33, 1.67) | 0.90                              | (0.79, 1.04) |
| Marital status                                 |            |              |                                    |              |                                   |              |
| Currently married                              |            |              | 1.00                               | Referent     | 1.00                              | Referent     |
| Never married                                  |            |              | 1.41                               | (1.11, 1.78) | 1.14                              | (0.87, 1.48) |
| Previously married                             |            |              | 1.25                               | (1.04, 1.49) | 1.24                              | (1.04, 1.48) |
| Household income                               |            |              |                                    |              |                                   |              |
| Less than 1Q                                   |            |              |                                    |              | 1.00                              | Referent     |
| 1Q–2Q                                          |            |              |                                    |              | 0.60                              | (0.51, 0.71) |
| 2Q–3Q                                          |            |              |                                    |              | 0.47                              | (0.39, 0.56) |
| 3Q–                                            |            |              |                                    |              | 0.37                              | (0.30, 0.45) |
| Education                                      |            |              |                                    |              |                                   |              |
| Junior high or less                            |            |              |                                    |              | 1.00                              | Referent     |
| High school                                    |            |              |                                    |              | 0.48                              | (0.41, 0.56) |
| College                                        |            |              |                                    |              | 0.29                              | (0.21, 0.41) |
| University and more                            |            |              |                                    |              | 0.32                              | (0.25, 0.41) |
| Current employment status                      |            |              |                                    |              |                                   |              |
| Unemployed                                     |            |              |                                    |              | 1.00                              | Referent     |
| Full-time student                              |            |              |                                    |              | 0.30                              | (0.19, 0.48) |
| Precarious employment                          |            |              |                                    |              | 0.47                              | (0.37, 0.59) |
| Non-precious employment                        |            |              |                                    |              | 0.29                              | (0.23, 0.35) |
| Employer                                       |            |              |                                    |              | 0.46                              | (0.38, 0.56) |

doi:10.1371/journal.pone.0030501.t004

of racial discrimination. However, there are people with “mixed-blood” in South Korea who have experienced discrimination in their daily lives in a South Korea society which gives preference to those who have a “pure-bloodline” [54]. Additionally, there are a growing number of foreign residents including both workers and students, coming mainly from China, the US, the Philippines, Japan and Vietnam in South Korea. They currently account for slightly more than two percent of the total population [55] but they are likely to be a higher proportion in the future. Research reveals that many of these individuals are exposed to pervasive discrimination in their daily lives, particularly migrant workers who have to face employment discrimination, economic exploitation and appalling working conditions [56,57]. These populations, because of their small size, are not present in large numbers in a typical national sample but future targeted studies should he levels and consequences of discrimination in these stigmatized groups.

### Limitations and strengths

The limitations of the study include the validity of the measure used to assess discrimination. The “Experience of Discrimination” questionnaire was developed to measure exposure to racial or gender discrimination in the U.S., and it is known to have reasonable psychometric properties in U.S. studies [28,58]. However, its validity for the South Korean context is unknown. For example, improving the discrimination questionnaire to be more sensitive to the social context in South Korea might require questions about discriminatory experience at home or at general social activities to be more specific to assess discrimination accurately. Questions about discriminatory experiences at home could usefully clarify whether the experiences originated with parents, a spouse or a significant other. Further studies are necessary to assess the cross-cultural validity and reliability of discrimination questions in South Korea. In addition, one version of the “Experience of Discrimination” questionnaire includes

information about the frequency of discriminatory experiences in each situation [58], but the version used in the present study assessed only whether respondents had experienced discrimination in their lifetime.

Second, because of the cross-sectional nature of the study, we are unable to identify any temporal ordering among the associations between perceived discrimination and health. Thus we are unable to rule out the possibility of reverse causation in which people in poor health would be more likely to report experiences of discrimination. This issue has been addressed in the larger literature on discrimination and health and prior research has documented that reports of discrimination are often associated with subsequent changes in physical and mental health [1].

A major strength of this study is its large sample size from a nationally representative sample of the South Korean population. Whereas previous studies have focused on the health effects of racial discrimination in Western countries, we found that non-racial discriminatory experiences are associated with poor health outcomes in an Asian country as well. Secondly, this study founds a consistent association between perceived discriminatory experience and health across multiple situations after adjusting for

potential confounding by gender, age, education level and household income.

To our knowledge, this is the first nationally representative study conducted in an Asian country that explored the association between perceived discrimination and health. It provides a glimpse of respondents' reports of the prevalence of multiple forms of non-racial discrimination and documents that these experiences are positively related to poor self-rated health. These findings, if replicated, suggests that experiences of discrimination may be an important determinant of health and of health disparities in South Korea and other Asian countries.

## Acknowledgments

The authors thank Mark Brewster for his comments on an earlier draft of this article.

## Author Contributions

Conceived and designed the experiments: S-SK DW. Analyzed the data: S-SK. Contributed reagents/materials/analysis tools: S-SK. Wrote the paper: S-SK DW.

## References

- Williams DR, Mohammed SA (2009) Discrimination and racial disparities in health: evidence and needed research. *J Behav Med* 32: 20–47.
- Paradies Y (2006) A systematic review of empirical research on self-reported racism and health. *Int J Epidemiol* 35: 888–901.
- Pascoe EA, Smart Richman L (2009) Perceived discrimination and health: a meta-analytic review. *Psychol Bull* 135: 531–554.
- Borrell C, Muntaner C, Gil-Gonzalez D, Artazcoz L, Rodriguez-Sanz M, et al. (2010) Perceived discrimination and health by gender, social class, and country of birth in a Southern European country. *Prev Med* 50: 86–92.
- Veling W, Hoek HW, Mackenbach JP (2008) Perceived discrimination and the risk of schizophrenia in ethnic minorities: a case-control study. *Soc Psychiatry Psychiatr Epidemiol* 43: 953–959.
- Bhui K, Stansfeld S, McKenzie K, Karlsen S, Nazroo J, et al. (2005) Racial/ethnic discrimination and common mental disorders among workers: findings from the EMPIRIC Study of Ethnic Minority Groups in the United Kingdom. *Am J Public Health* 95: 496–501.
- Hunte HE, Williams DR (2009) The association between perceived discrimination and obesity in a population-based multiracial and multiethnic adult sample. *Am J Public Health* 99: 1285–1292.
- Albert MA, Ravenell J, Glynn RJ, Khera A, Halevy N, et al. (2008) Cardiovascular risk indicators and perceived race/ethnic discrimination in the Dallas Heart Study. *Am Heart J* 156: 1103–1109.
- Gee GC, Ro A, Shariff-Marco S, Chae D (2009) Racial discrimination and health among Asian Americans: evidence, assessment, and directions for future research. *Epidemiol Rev* 31: 130–151.
- de Castro AB, Gee GC, Takeuchi DT (2008) Workplace discrimination and health among Filipinos in the United States. *Am J Public Health* 98: 520–526.
- Gee GC, Spencer M, Chen J, Yip T, Takeuchi DT (2007) The association between self-reported racial discrimination and 12-month DSM-IV mental disorders among Asian Americans nationwide. *Soc Sci Med* 64: 1984–1996.
- Ferrie JE, Head J, Shipley MJ, Vahtera J, Marmot MG, et al. (2006) Injustice at work and incidence of psychiatric morbidity: the Whitehall II study. *Occup Environ Med* 63: 443–450.
- De Vogli R, Brunner E, Marmot MG (2007) Unfairness and the social gradient of metabolic syndrome in the Whitehall II Study. *J Psychosom Res* 63: 413–419.
- De Vogli R, Ferrie JE, Chandola T, Kivimaki M, Marmot MG (2007) Unfairness and health: evidence from the Whitehall II Study. *J Epidemiol Community Health* 61: 513–518.
- Moomal H, Jackson PB, Stein DJ, Herman A, Myer L, et al. (2009) Perceived discrimination and mental health disorders: the South African Stress and Health study. *S Afr Med J* 99: 383–389.
- Williams DR, Gonzalez HM, Williams S, Mohammed SA, Moomal H, et al. (2008) Perceived discrimination, race and health in South Africa. *Soc Sci Med* 67: 441–452.
- Berik G, Rodgers Yvdm, Zveglic JE (2004) International Trade and Gender Wage Discrimination: Evidence from East Asia. *Review of Development Economics* 8: 237–254.
- Liu JX, Choi K (2006) Experiences of social discrimination among men who have sex with men in Shanghai, China. *AIDS Behav* 10: S25–S33.
- Asakura T, Gee GC, Nakayama K, Niwa S (2008) Returning to the "homeland": work-related ethnic discrimination and the health of Japanese Brazilians in Japan. *Am J Public Health* 98: 743–750.
- Lam AM, Tsoi KW, Chan TS (2005) Adolescent Chinese immigrants in Hong Kong: a comparison with locally born students and factors associated with their psychological well-being. *Int J Adolesc Med Health* 17: 157–168.
- Lin D, Li X, Wang B, Hong Y, Fang X, et al. (2009) Discrimination, Perceived Social Inequity, and Mental Health Among Rural-to-Urban Migrants in China. *Community Ment Health J*.
- Kim MH, Kim HJ (2007) An untold story in labor health: Korean women workers. *New Solut* 17: 325–343.
- Soh C-HS (1993) Sexual equality, male superiority, and Korean women in politics: Changing gender relations in a "patriarchal democracy". *Sex Roles* 28: 73–90.
- Larsen U, Chung W, Gupta MD (1998) Fertility and Son Preference in Korea. *Population Studies* 52: 317–325.
- Chung W (2007) The relation of son preference and religion to induced abortion: the case of South Korea. *J Biosoc Sci* 39: 707–719.
- Kim Y (2010) Magnitude and Reality of precarious employment. Seoul: Korean Labour & Society Institute.
- Chun H, Doyal L, Payne S, Il-Cho S, Kim IH (2006) Understanding women, health, and social change: the case of South Korea. *Int J Health Serv* 36: 575–592.
- Krieger N (1990) Racial and gender discrimination: risk factors for high blood pressure? *Soc Sci Med* 30: 1273–1281.
- Jean A (2003) The Socio-Economic Background of the Gwangju Uprising. *New Political Science* 25: 159 — 176.
- Choi JJ (1993) State and Society in Contemporary Korea Koo H, editor: Cornell University Press.
- Rogers AE, Hwang W-T, Scott LD, Aiken LH, Dinges DF (2004) The Working Hours Of Hospital Staff Nurses And Patient Safety. *Health Affairs* 23: 202–212.
- DeSalvo KB, Bloser N, Reynolds K, He J, Muntner P (2006) Mortality Prediction with a Single General Self-Rated Health Question. *Journal of General Internal Medicine* 21: 267–275.
- Idler EL, Benyamini Y (1997) Self-rated health and mortality: a review of twenty-seven community studies. *J Health Soc Behav* 38: 21–37.
- Kim MH, Kim CY, Park JK, Kawachi I (2008) Is precarious employment damaging to self-rated health? Results of propensity score matching methods, using longitudinal data in South Korea. *Soc Sci Med* 67: 1982–1994.
- Kim IH, Khang YH, Muntaner C, Chun H, Cho SI (2008) Gender, precarious work, and chronic diseases in South Korea. *Am J Ind Med* 51: 748–757.
- Rogers WH (1993) Regression standard errors in clustered samples. *Stata Technical Bulletin* 19–23.
- Williams RL (2000) A note on robust variance estimation for cluster-correlated data. *Biometrics* 645–646.
- Hahn HC, Ozonoff A, Gaumond J, Sue S (2010) Perceived discrimination and health outcomes a gender comparison among Asian-Americans nationwide. *Women's Health Issues* 20: 350–358.
- Veling W, Selten JP, Susser E, Laan W, Mackenbach JP, et al. (2007) Discrimination and the incidence of psychotic disorders among ethnic minorities in The Netherlands. *Int J Epidemiol* 36: 761–768.
- Pavalko EK, Mossakowski KN, Hamilton VJ (2003) Does Perceived Discrimination Affect Health? Longitudinal Relationships between Work Discrimination and Women's Physical and Emotional Health. *Journal of Health and Social Behavior* 44: 18–33.

41. Din-Dzietham R, Nembhard WN, Collins R, Davis SK (2004) Perceived stress following race-based discrimination at work is associated with hypertension in African-Americans. *The metro Atlanta heart disease study, 1999–2001. Social Science & Medicine* 58: 449–461.
42. Taylor DM, Wright SC, Porter LE (1994) Dimensions of perceived discrimination: The personal/group discrimination discrepancy. In: Zanna MP, Olson JM, eds. *The psychology of prejudice: The Ontario symposium, Vol 7*. HillsdaleNJ, , England: Lawrence Erlbaum Associates, Inc. pp 233–255.
43. Taylor DM (1991) The personal/group discrimination discrepancy: Responses to experimentally induced personal and group discrimination. *The Journal of social psychology* 131: 847.
44. Hanam SP (2004) Educational inequality in Korea: Recent trends and persistent structure. *Korea Journal* 44: 42–74.
45. Kim S (2004) *Hakbul Society*. Seoul: Hangilsa.
46. Son M (2004) Commentary: Why the educational effect is so strong in differentials of mortality in Korea? *International Journal of Epidemiology* 33: 308–310.
47. Khang YH, Lynch JW, Kaplan GA (2004) Health inequalities in Korea: age- and sex-specific educational differences in the 10 leading causes of death. *Int J Epidemiol* 33: 299–308.
48. Monkturner E, Turner CG (1994) South-Korean Labor-Market Discrimination against Women - Estimating Its Cost. *American Journal of Economics and Sociology* 53: 433–442.
49. Seguino S (1997) Gender wage inequality and export-led growth in South Korea. *Journal of Development Studies* 34: 102–132.
50. Crosby F (1984) The Denial of Personal Discrimination. *American Behavioral Scientist* 27: 371–386.
51. OECD (2010) *OECD Factbook 2010*: OECD Publishing.
52. Jones RS (2005) The labor market in Korea: Enhancing flexibility and raising participation Economic Department Working Papers No. 469 p.
53. Jang SN, Cho SI, Chang J, Boo K, Shin HG, et al. (2009) Employment status and depressive symptoms in Koreans: results from a baseline survey of the Korean Longitudinal Study of Aging. *J Gerontol B Psychol Sci Soc Sci* 64: 677–683.
54. Shin G-W (2006) *Ethnic Nationalism in Korea: Genealogy, Politics, and Legacy*: Stanford University Press.
55. Chang D-H (2007) *Committee On Elimination Of Racial Discrimination Considers Report Of Republic Of Korea*. United Nations.
56. Amnesty International (2006) *South Korea: 'Migrant workers are also human beings'*. Amnesty International.
57. Choe S-H (2009) *South Koreans Struggle With Race*. The New York Times. Seoul.
58. Krieger N, Smith K, Naishadham D, Hartman C, Barbeau EM (2005) Experiences of discrimination: validity and reliability of a self-report measure for population health research on racism and health. *Soc Sci Med* 61: 1576–1596.
